# Supplementary material for: Versican G3 Promotes Mouse Mammary Tumor Cell Growth, Migration, and Metastasis by Influencing EGF Receptor Signaling
Source: PubMed Central journal article supplement (PMC2974650; doi:10.1371/journal.pone.0013828), 2010-11-05
Supplement: pone.0013828.s002.pdf [file pone.0013828.s002.pdf]

**a**

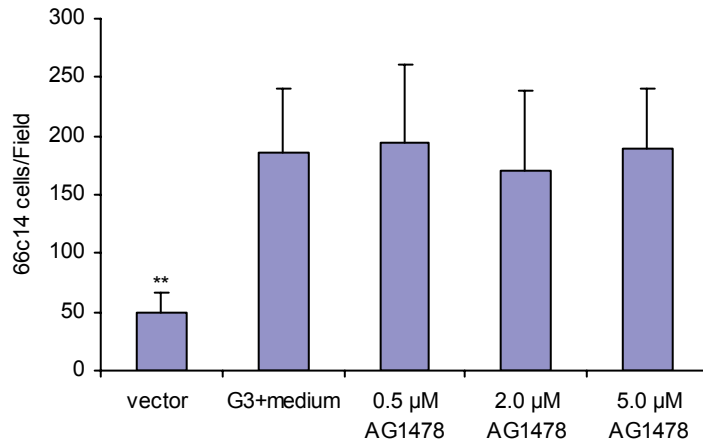

**b**

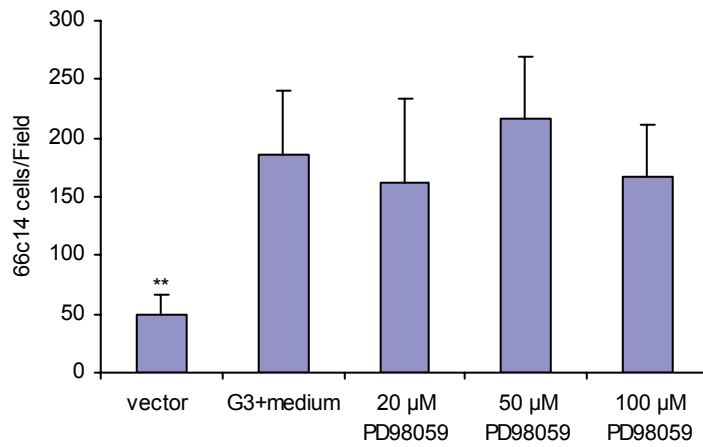

**Fig S2**
