# Supplementary material for: Versican G3 Promotes Mouse Mammary Tumor Cell Growth, Migration, and Metastasis by Influencing EGF Receptor Signaling
Source: PubMed Central journal article supplement (PMC2974650; doi:10.1371/journal.pone.0013828), 2010-11-05
Supplement: pone.0013828.s004.pdf [file pone.0013828.s004.pdf]

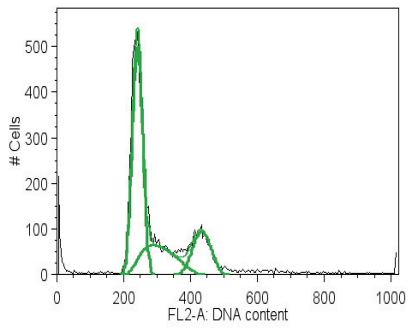

Dean/Jett/Fox: %G1=64.5, %S=21.7, %G2=16.7.  
 Vector in 0  $\mu$  M AG 1478  
 Event Count: 10000

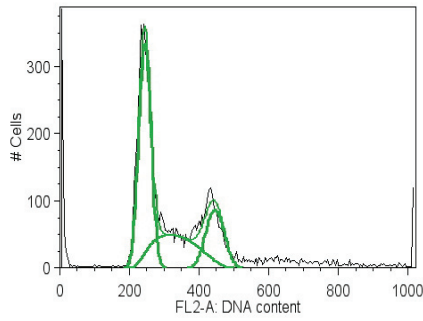

Dean/Jett/Fox: %G1=41.2, %S=38.6, %G2=24.5.  
 G3 in 0  $\mu$  M AG 1478  
 Event Count: 10000

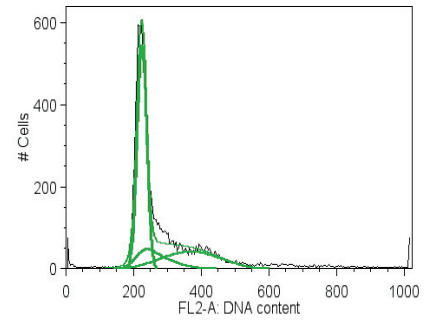

Dean/Jett/Fox: %G1=61.5, %S=16.3, %G2=24.1.  
 Vector in 0.5  $\mu$  M AG 1478  
 Event Count: 10000

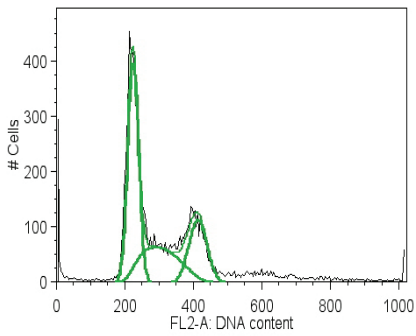

Dean/Jett/Fox: %G1=49.3, %S=29.3, %G2=21.8.  
 G3 in 0.5  $\mu$  M AG 1478  
 Event Count: 10000

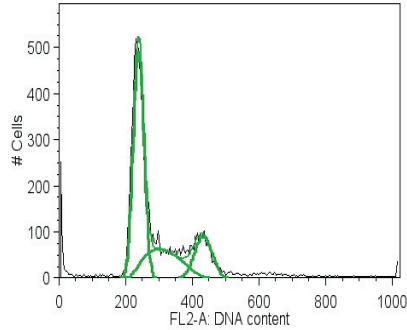

Dean/Jett/Fox: %G1=57.5, %S=21.7, %G2=17.8.  
 Vector in 2.0  $\mu$  M AG 1478  
 Event Count: 10000

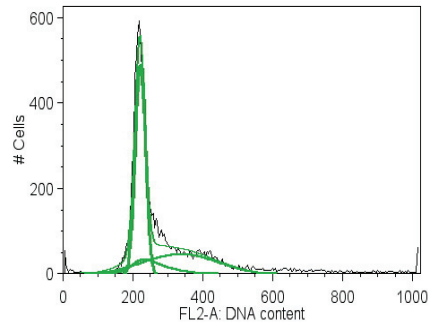

Dean/Jett/Fox: %G1=52.3, %S=13.7, %G2=25.7.  
 G3 in 2.0  $\mu$  M AG 1478  
 Event Count: 10000

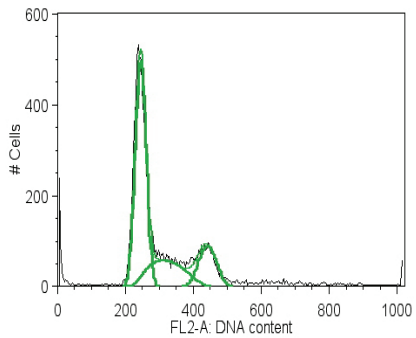

Dean/Jett/Fox: %G1=56.6, %S=23.5, %G2=15.6.  
 vector in 5.0  $\mu$  M AG 1478  
 Event Count: 10000

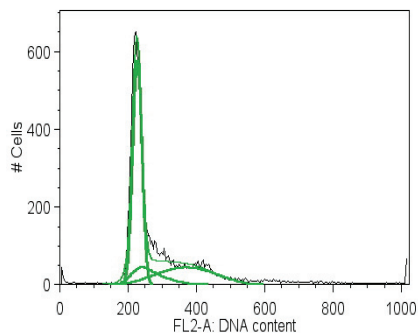

Dean/Jett/Fox: %G1=55.7, %S=15.7, %G2=20.8.  
 G3 in 5.0  $\mu$  M AG 1478  
 Event Count: 10000

Fig S4
