# Supplementary material for: Versican G3 Promotes Mouse Mammary Tumor Cell Growth, Migration, and Metastasis by Influencing EGF Receptor Signaling
Source: PubMed Central journal article supplement (PMC2974650; doi:10.1371/journal.pone.0013828), 2010-11-05
Supplement: pone.0013828.s005.pdf [file pone.0013828.s005.pdf]

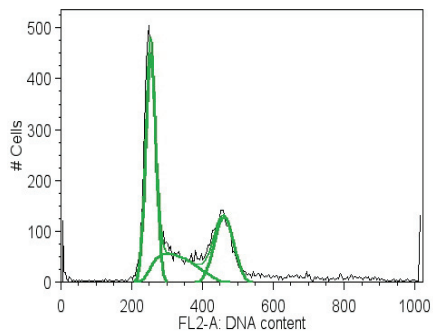

Dean/Jett/Fox: %G1=54.3, %S=18.7, %G2=19.9.  
 Vector in 0  $\mu$  M PD 98059  
 Event Count: 10000

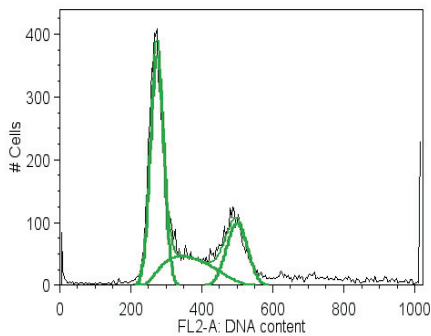

Dean/Jett/Fox: %G1=37.8, %S=29.6, %G2=27.1.  
 G3 in 0  $\mu$  M PD 98059  
 Event Count: 10000

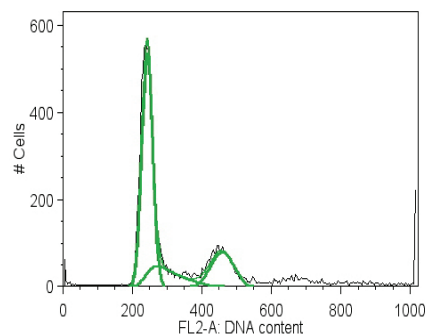

Dean/Jett/Fox: %G1=57.6, %S=17.3, %G2=19.2.  
 vector in 20  $\mu$  M PD 98059  
 Event Count: 10000

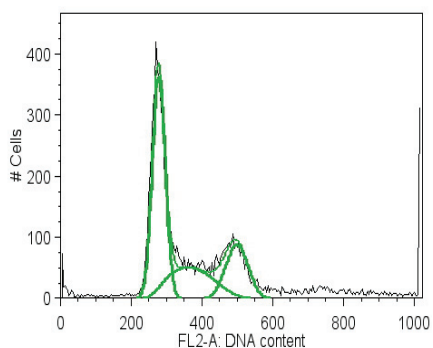

Dean/Jett/Fox: %G1=44.9, %S=27.3, %G2=22.8.  
 G3 in 20  $\mu$  M PD 98059  
 Event Count: 10000

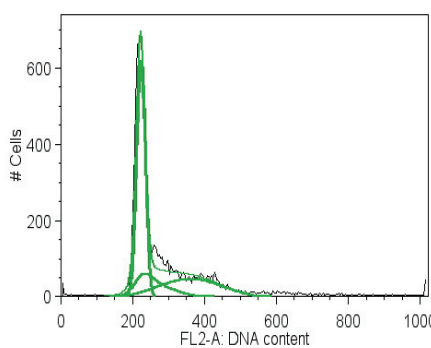

Dean/Jett/Fox: %G1=62.7, %S=11.4, %G2=24.2.  
 vector in 50  $\mu$  M PD 98059  
 Event Count: 10000

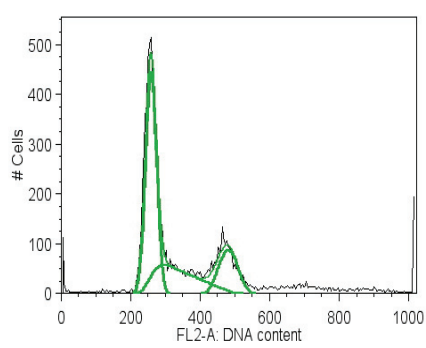

Dean/Jett/Fox: %G1=59, %S=21.7, %G2=15.7.  
 G3 in 50  $\mu$  M PD 98059  
 Event Count: 10000

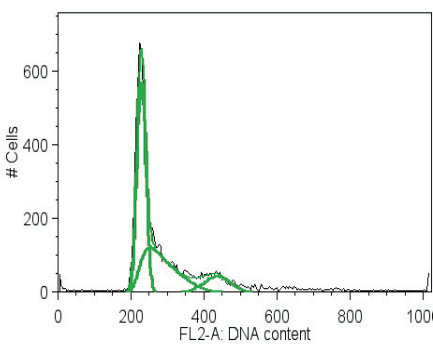

Dean/Jett/Fox: %G1=61.3, %S=22.6, %G2=12.2.  
 vector in 100  $\mu$  M PD 98059  
 Event Count: 10000

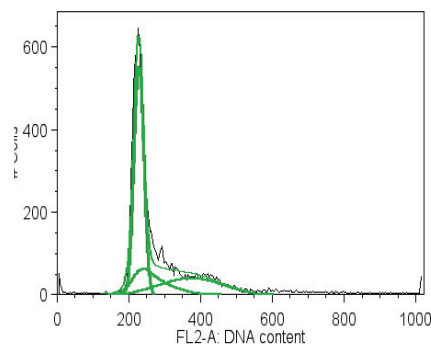

Dean/Jett/Fox: %G1=59.5, %S=15.8, %G2=22.1.  
 G3 in 100  $\mu$  M PD 98059  
 Event Count: 10000

**Fig S5**
